# Supplementary material
Source: PubMed Central journal article supplement (PMC2268127)

**Current ( $\mu\text{A}$ )**

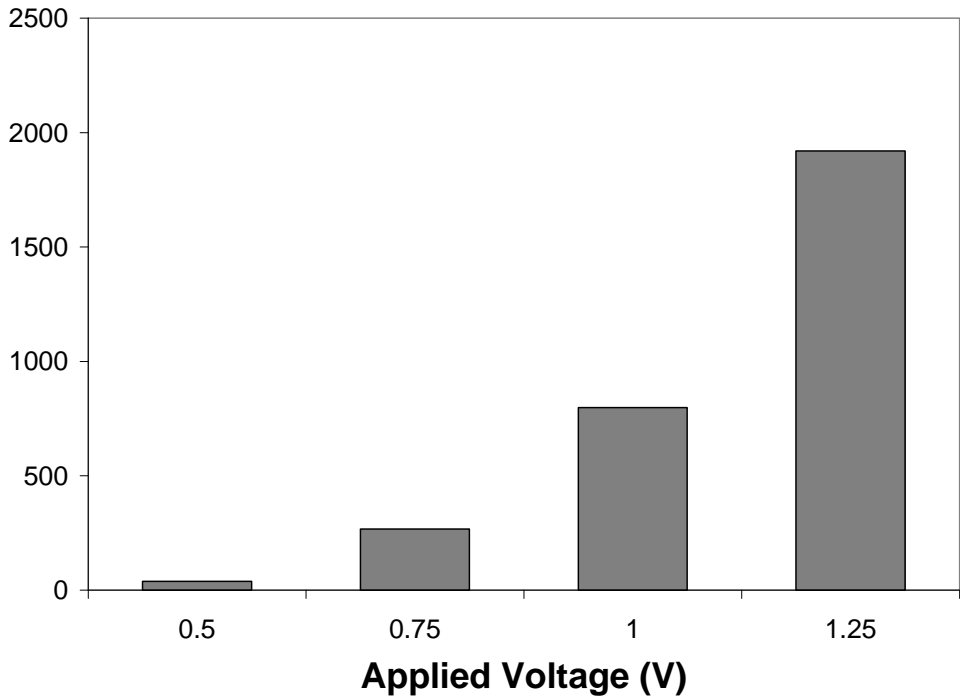

Supplement: supp_0706994105_06994Fig10.pdf [file supp_0706994105_06994Fig10.pdf]

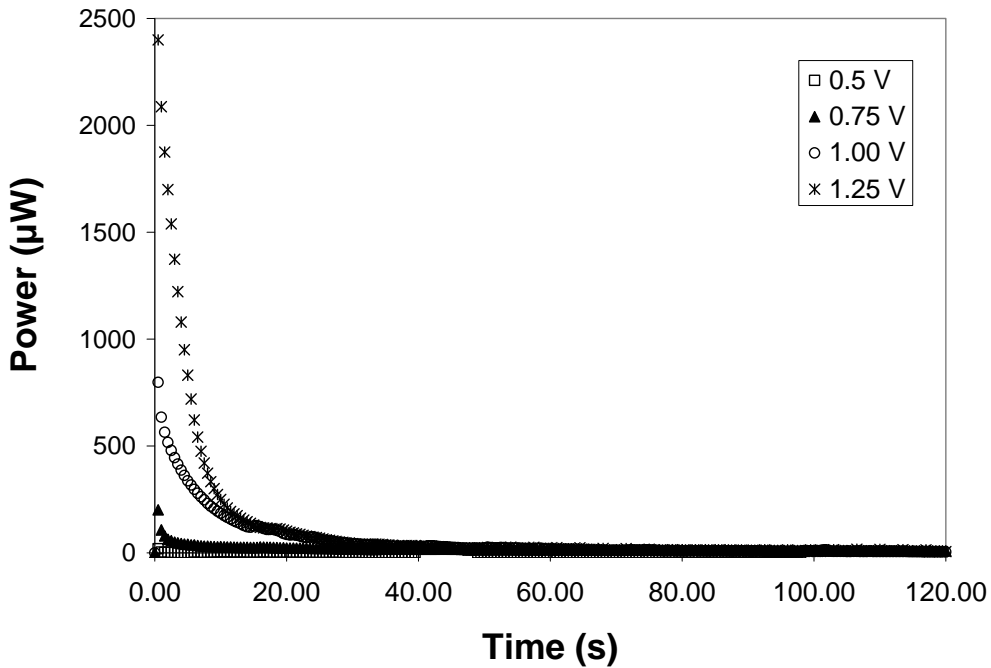

Supplement: supp_0706994105_06994Fig11.pdf [file supp_0706994105_06994Fig11.pdf]

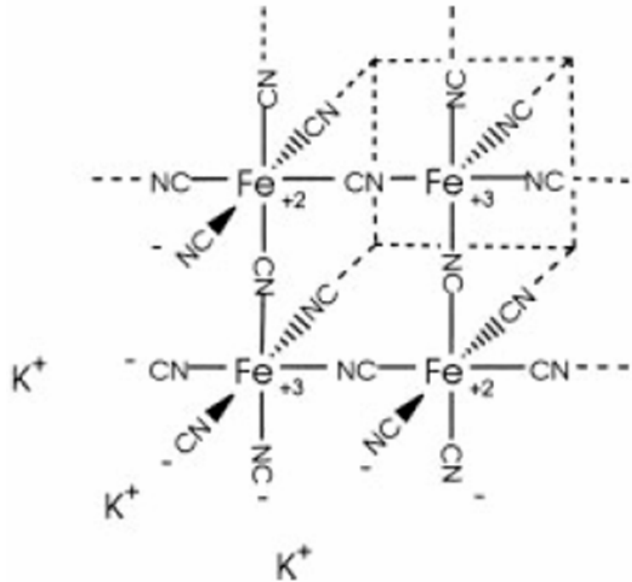

Supplement: supp_0706994105_06994Fig6.pdf [file supp_0706994105_06994Fig6.pdf]

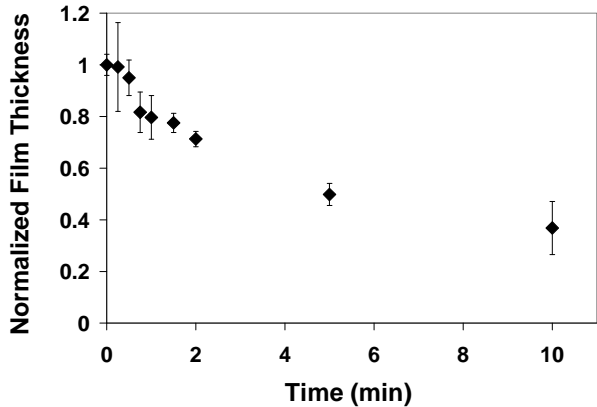

(a)

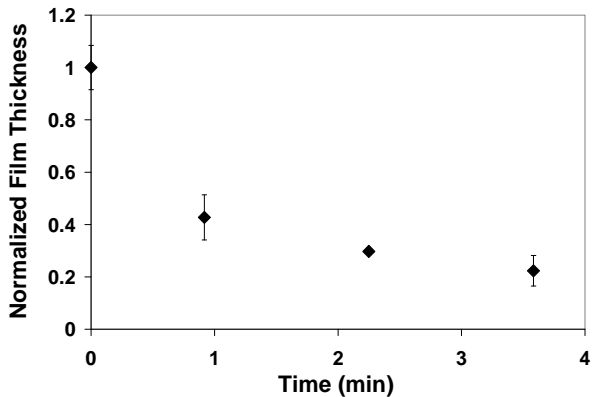

(b)

Supplement: supp_0706994105_06994Fig7.pdf [file supp_0706994105_06994Fig7.pdf]

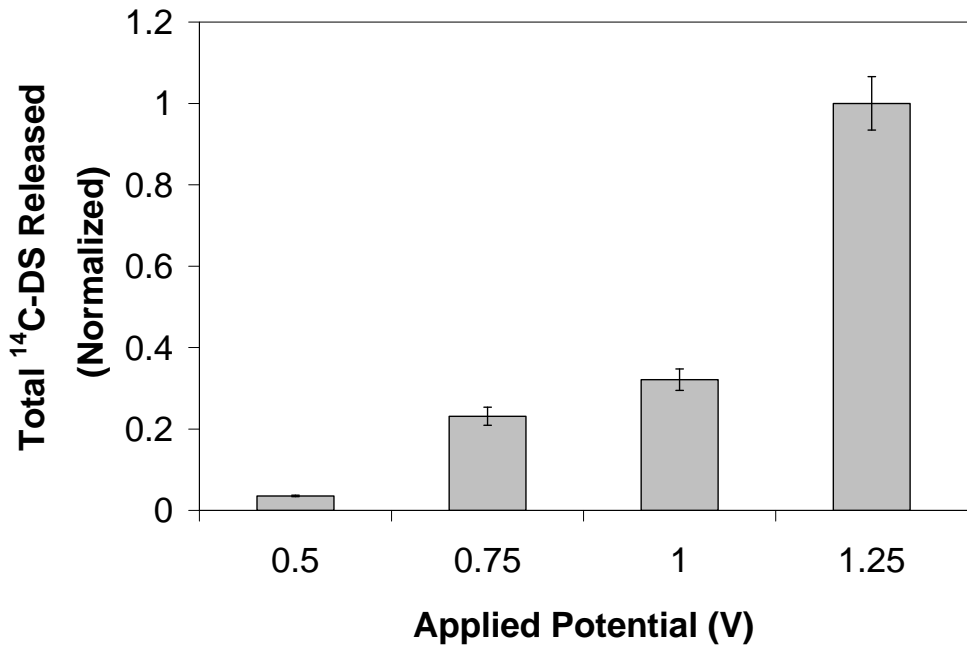

Supplement: supp_0706994105_06994Fig8.pdf [file supp_0706994105_06994Fig8.pdf]

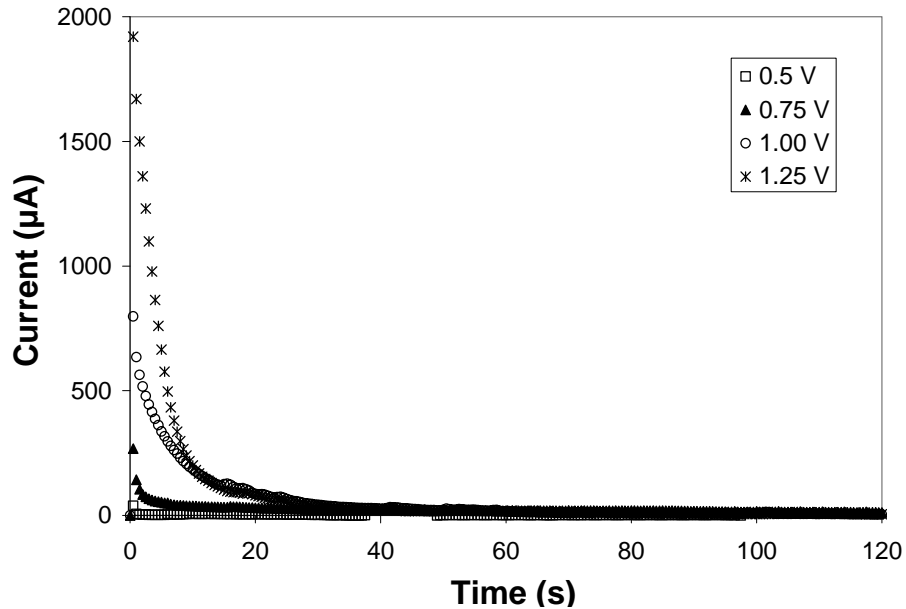

Supplement: supp_0706994105_06994Fig9.pdf [file supp_0706994105_06994Fig9.pdf]
